# Supplementary material
Source: publisher site journal article supplement (https://www.spandidos-publications.com/3442/downloadSupplementary)

Figure S1. Si-circ\_0008932 inhibits osteosarcoma cell invasion and migration by targeting miR-145-5p. (A) A Transwell assay was used to examine the invasion and migration of SaOS-2 cells after co-transfection with si-circ\_0008932 and miR-145-5p inhibitors. (B) A Transwell assay was used to determine the invasion and migration of U2OS cells co-transfected with si-circ\_0008932 and miR-145-5p mimics. Magnification, x200. miR, microRNA; si, short interfering RNA; NC, negative control.

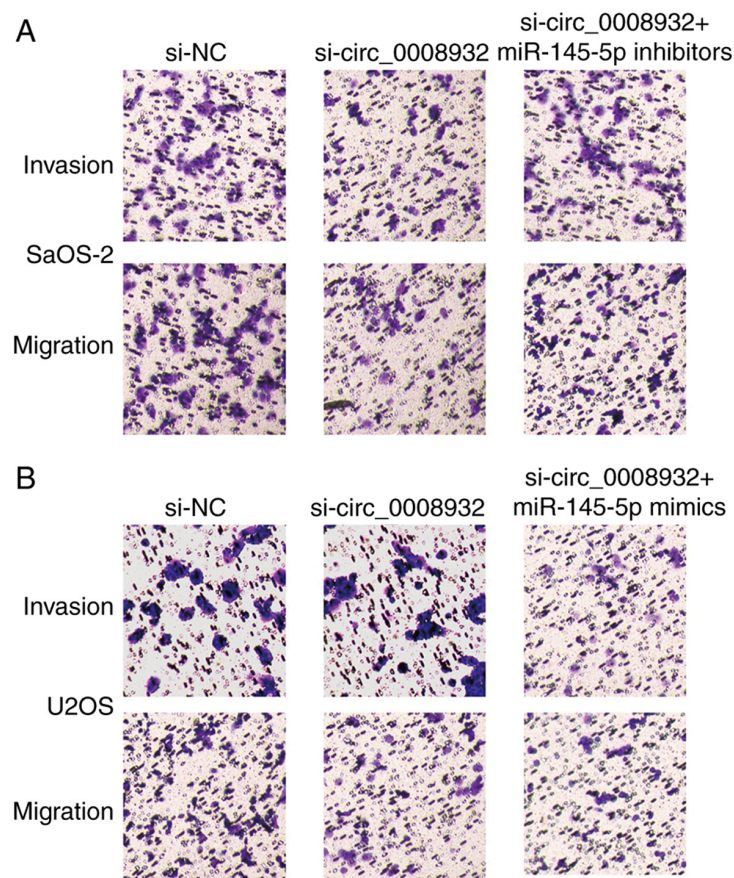

Figure S2. Si-circ\_0008932 promotes osteosarcoma cell invasion and migration by targeting miR-145-5p. (A) Apoptosis was measured in SaOS-2 cells after co-transfection with si-circ\_0008932 and miR-145-5p inhibitors. (B) The apoptosis was examined in U2OS cells co-transfected with si-circ\_0008932 and miR-145-5p mimics. PI, propidium iodide; A, absorbance; miR, microRNA; si, short interfering RNA; NC, negative control.

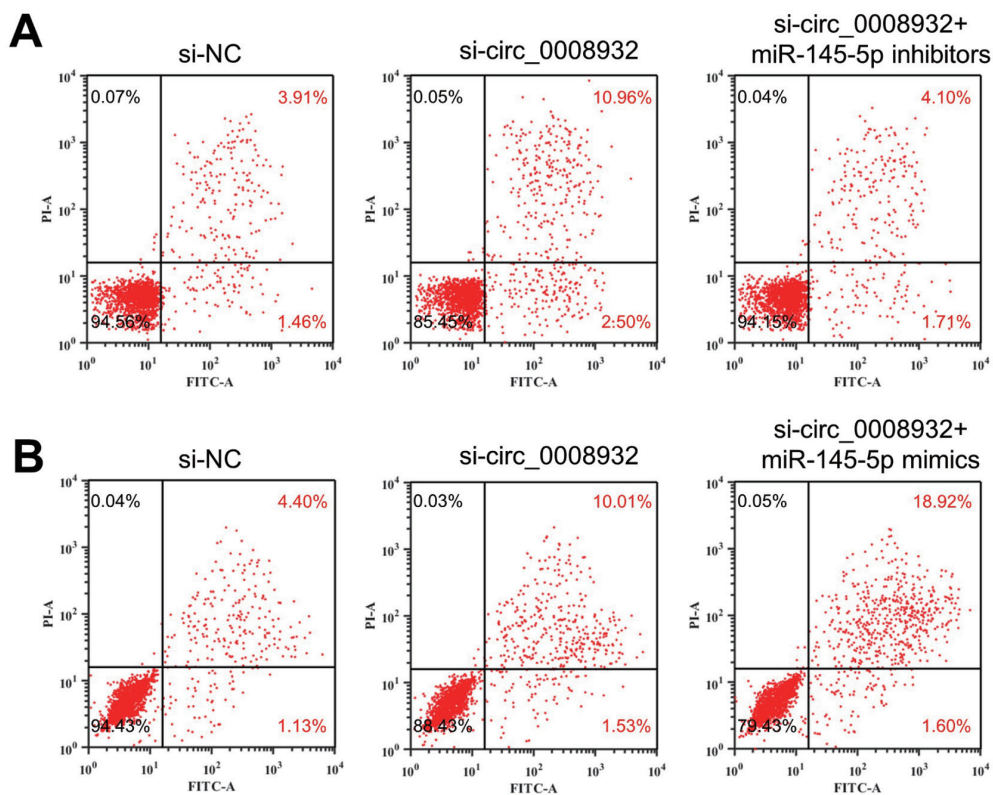

Supplement: Supplementary file 1 [file downloadSupplementary]
